# Supplementary material for: Sustainable and low-toxicity pyrazolyl N-methyliminodiacetic acid boronate as a nitrogen–boron flame retardant for functional silk
Source: Royal Society of Chemistry journal article supplement (doi:10.1039/d5nj01514f), 2025-01-01
Supplement: d5nj01514f1.pdf [file d5nj01514f1.pdf]

## *Supporting Information*

# **Sustainable and low-toxicity pyrazolyl *N*-methyliminodiacetic acid boronate as nitrogen-boron flame retardant for functional silk**

Ying Hong,<sup>a</sup> Yu Zhang,<sup>a</sup> Rong Chen,<sup>a</sup> Jia Yuan\*<sup>a</sup> and Fengxiang Chen\*<sup>a</sup>

<sup>a</sup> State Key Laboratory of New Textile Materials and Advanced Processing, Wuhan Textile University, Wuhan 430200, P. R. China.

E-mail: jyuan@wtu.edu.cn; fxchen\_czx@wtu.edu.cn

## **Table of Contents**

|                                                                         |    |
|-------------------------------------------------------------------------|----|
| 1. TGA and DTG curves of BN1, BN2, BN3, and the neat silk.....          | S2 |
| 2. TGA and DTG curves of the silk and BN-silks. ....                    | S2 |
| 2. Cone calorimeter data of the neat silk, BN1-silk and BN2-silk.....   | S3 |
| 3. L929 cells were treated with various concentrations of BN3.....      | S3 |
| 4. The EDS tests data and images.....                                   | S4 |
| 5. FT-IR spectra for the char residue of BN3-silk.....                  | S4 |
| 6. C 1s, O 1s and N 1s XPS spectra of the char residue of BN3-silk..... | S5 |

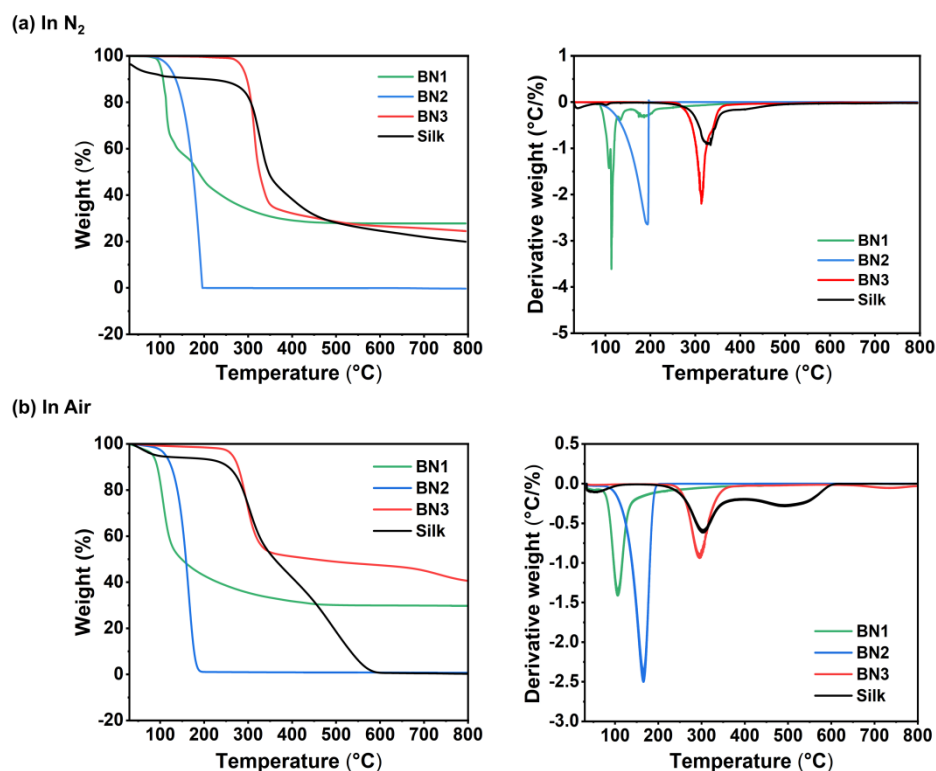

**Fig. S1** TGA and DTG curves of BN1, BN2, BN3, and the neat silk in (a)  $N_2$  and (b) air.

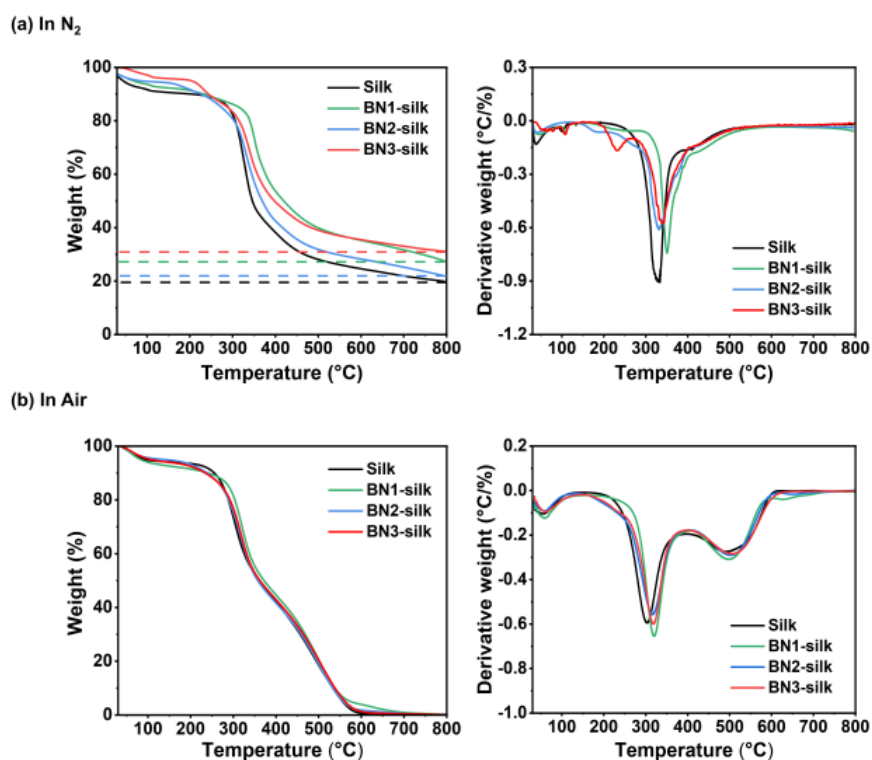

**Fig. S2** TGA and DTG curves of the neat silk and BN-silks in (a)  $N_2$  and (b) air.

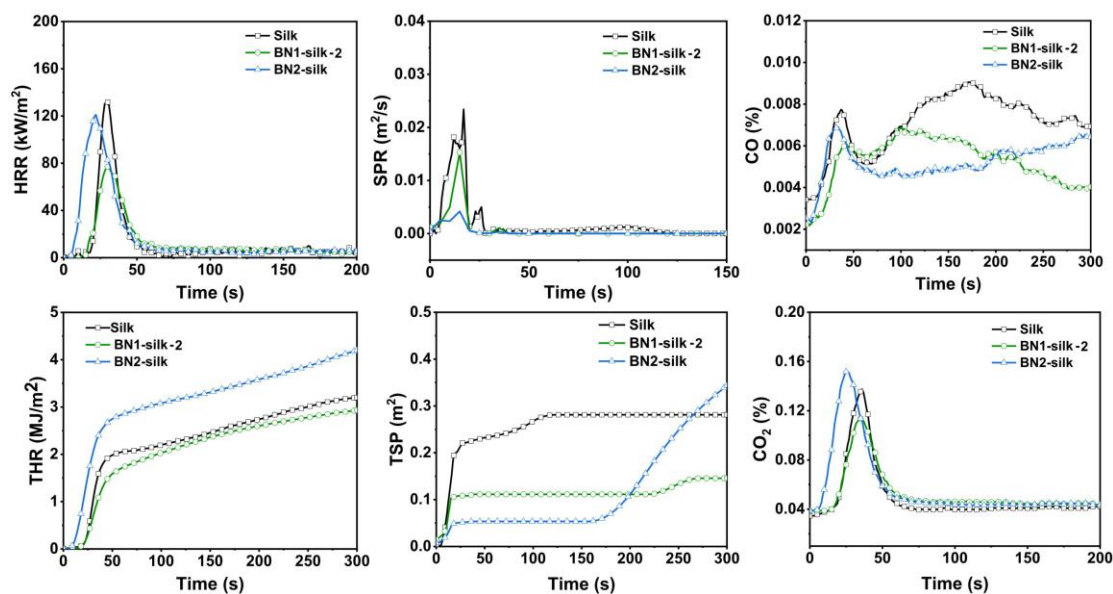

**Fig. S3** Cone calorimeter data of the neat silk, BN1-silk-2 and BN2-silk: (a) HRR curves; (b) THR curves; (c) SPR curves; (d) TSR curves; (e) CO<sub>2</sub> curves; (f) CO curves.

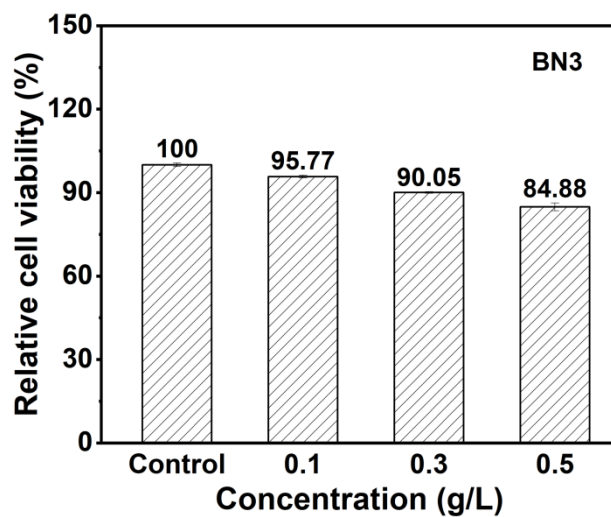

**Fig. S4** L929 cells were treated with various concentrations of BN3 (0, 0.1 g/L, 0.3 g/L, 0.5 g/L).

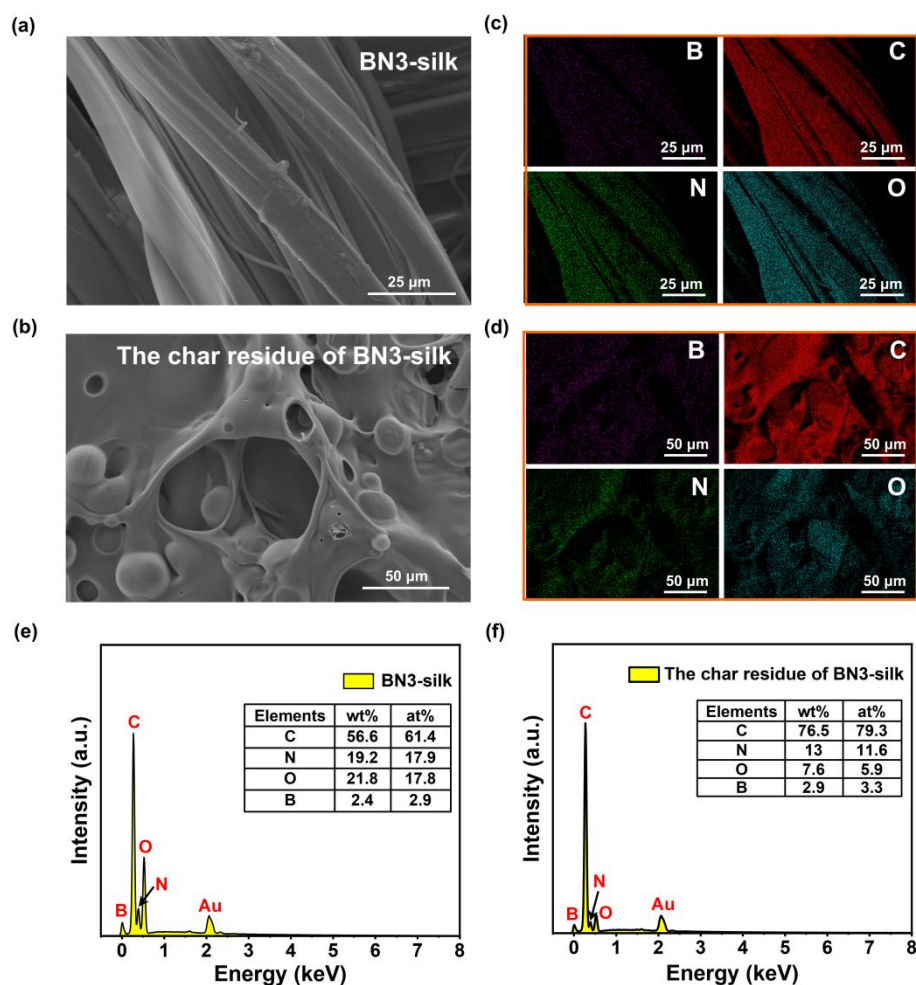

**Fig. S5** (a) The SEM image of BN3-silk. (b) The SEM image of the char residue for BN3-silk. (c) The EDS mapping of BN3-silk. (d) The EDS mapping of the char residue of BN3-silk. (e) The EDS results of BN3-silk (f) The EDS results of the char residue of BN3-silk

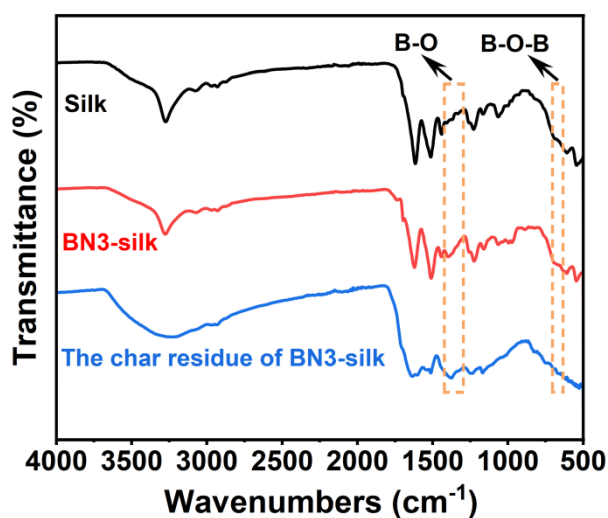

**Fig. S6** FT-IR spectra for the char residue of BN3-silk.

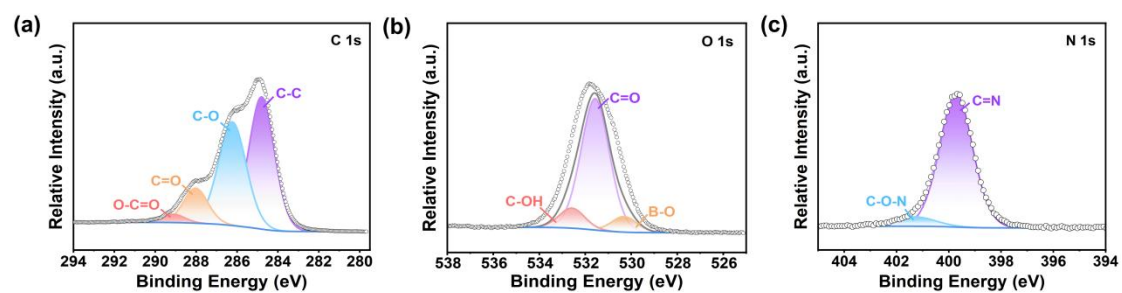

**Fig. S7** (a) C 1s XPS spectra of the char residue of BN3-silk. (b) O 1s XPS spectra of the char residue of BN3-silk. (c) N 1s XPS spectra of the char residue of BN3-silk.
